# Supplementary material for: Energy transfer-induced blue light-excited broadband near-infrared luminescence in fluoride Na 3 AlF 6 :Mn 4+ ,Fe 3+
Source: Royal Society of Chemistry journal article supplement (doi:10.1039/d4tc02893g), 2024-01-01
Supplement: d4tc02893g1.pdf [file d4tc02893g1.pdf]

## Supplementary Material

### Energy Transfer Induced Blue-Light Excited Broadband Near-infrared

### Luminescence in Fluoride $\text{Na}_3\text{AlF}_6:\text{Mn}^{4+},\text{Fe}^{3+}$

Fanquan He<sup>a</sup>, Enhai Song<sup>a\*</sup> and Qinyuan Zhang<sup>a,b\*</sup>

<sup>a</sup>State Key Laboratory of Luminescent Material and Devices, Guangdong Provincial Key Laboratory of Fiber Laser Materials and Applied Techniques, School of Materials Science and Engineering, South China University of Technology, Guangzhou 510641, China.

<sup>b</sup>School of Physics and Optoelectronics, South China University of Technology, Guangzhou 510641, China

\*Correspondence: [msehsong@scut.edu.cn](mailto:msehsong@scut.edu.cn) (E. H. Song); [qyzhang@scut.edu.cn](mailto:qyzhang@scut.edu.cn) (Q. Y. Zhang)

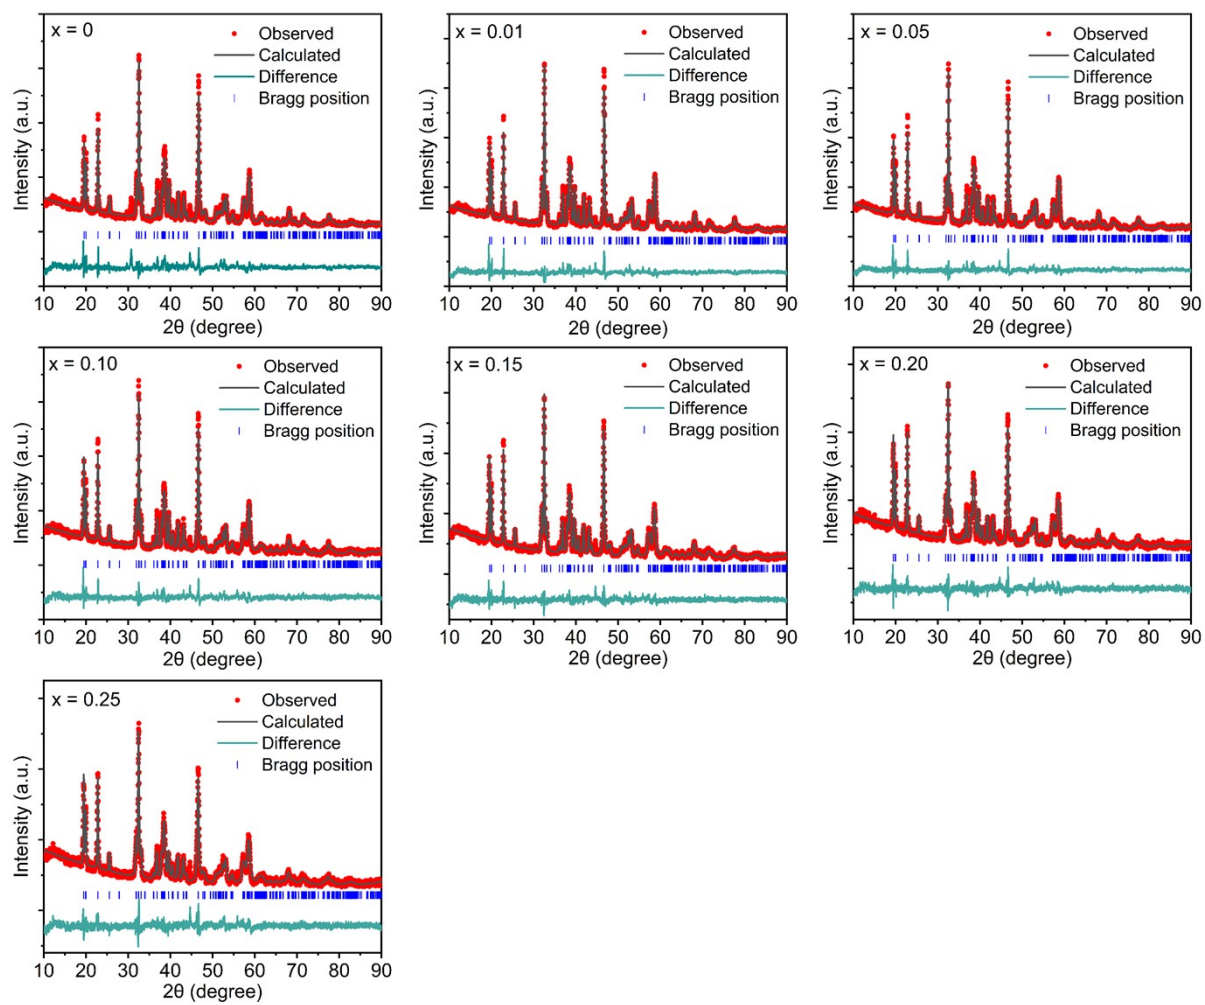

**Fig. S1.** Rietveld refinement results of NAF:0.03Mn<sup>4+</sup>, xFe<sup>3+</sup> (x = 0-0.25).

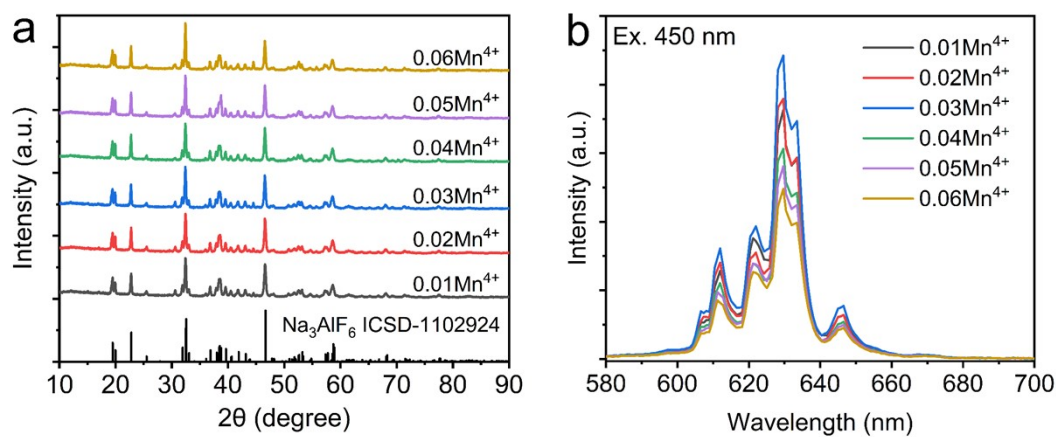

**Fig. S2.** (a) XRD patterns and (b) emission spectra of  $\text{Na}_3\text{AlF}_6:\text{yMn}^{4+}$  ( $y = 0.01-0.06$ ).

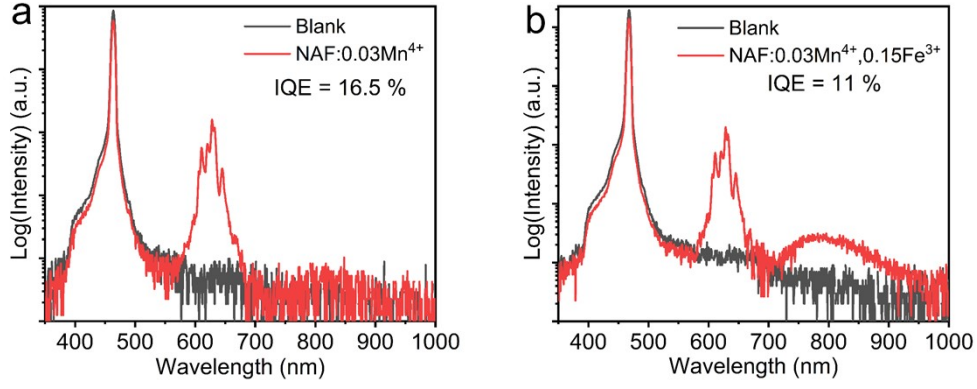

**Fig. S3.** The quantum efficiency results of NAF:0.03Mn<sup>4+</sup> (a) and NAF:0.03Mn<sup>4+</sup>, 0.15Fe<sup>3+</sup> (b) upon excitation at 463 nm blue light. The internal quantum efficiency (IQE) can be calculated by the following equation:

$$IQE = \frac{\int L_S}{\int E_B - E_S} \times 100\% \quad (S1)$$

where  $L_S$  means the emitted photons of the samples,  $E_S$  and  $E_B$  is the integrated area of the excitation light with and without the phosphor.

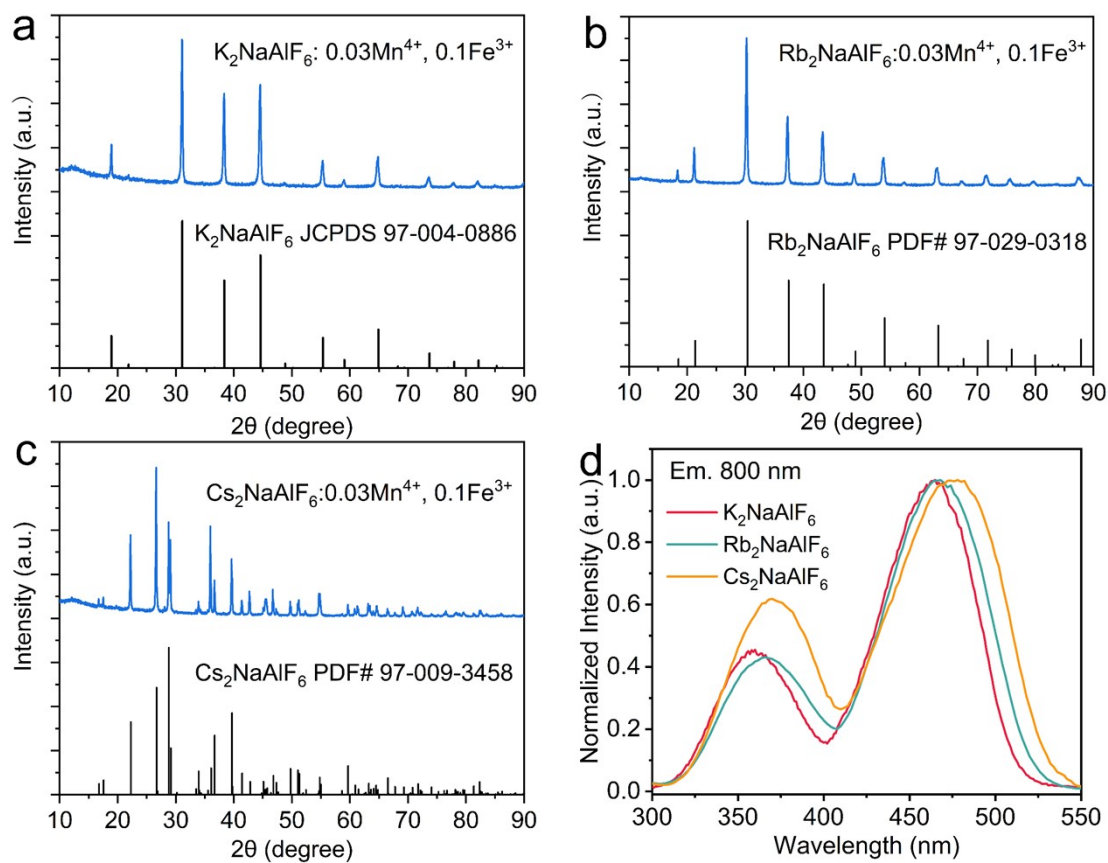

**Fig. S4.** (a-c) XRD patterns of  $\text{K}_2\text{NaAlF}_6:0.03\text{Mn}^{4+}, 0.1\text{Fe}^{3+}$ ,  $\text{Rb}_2\text{NaAlF}_6:0.03\text{Mn}^{4+}, 0.1\text{Fe}^{3+}$ ,  $\text{Cs}_2\text{NaAlF}_6:0.03\text{Mn}^{4+}, 0.1\text{Fe}^{3+}$ . (b) The normalized excitation spectra of  $\text{K}_2\text{NaAlF}_6:0.03\text{Mn}^{4+}, 0.1\text{Fe}^{3+}$ ,  $\text{Rb}_2\text{NaAlF}_6:0.03\text{Mn}^{4+}, 0.1\text{Fe}^{3+}$ ,  $\text{Cs}_2\text{NaAlF}_6:0.03\text{Mn}^{4+}, 0.1\text{Fe}^{3+}$ .

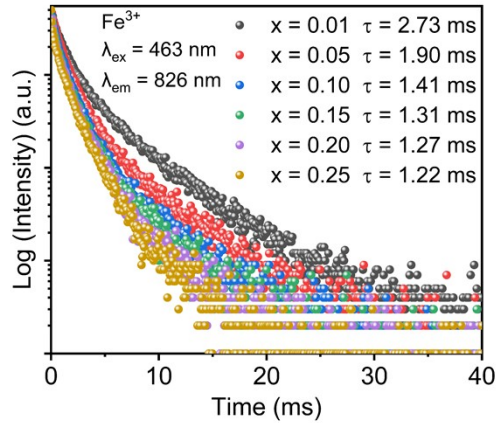

**Fig. S5.** The decay curves of NAF:0.03Mn<sup>4+</sup>, xFe<sup>3+</sup> monitored at 826 nm. The continuous decrease lifetime with increasing Fe<sup>3+</sup> concentration can be understood since concentration quenching of Fe<sup>3+</sup> will result in increased non-radiative transition probability and thus the decay became faster.

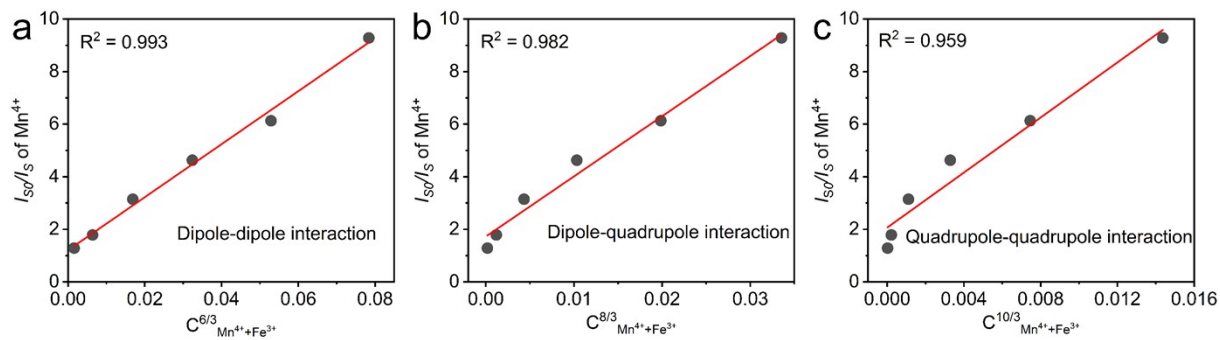

**Fig. S6.**  $I_{S0}/I_S$ - $C^{a/3}$  diagram of NAF:0.03 $Mn^{4+}$ ,  $xFe^{3+}$ .

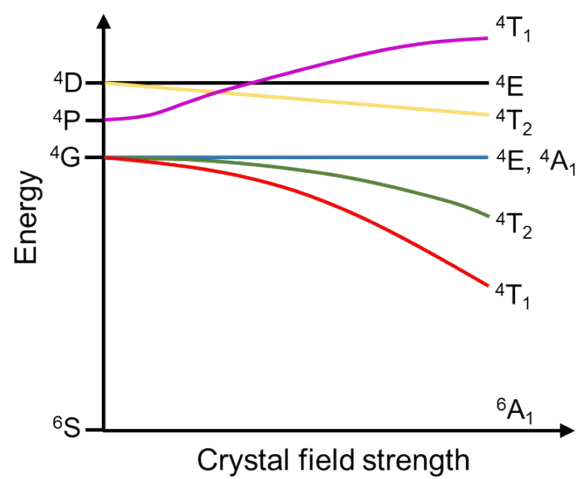

**Fig. S7.** The Tanabe–Sugano diagram for Fe<sup>3+</sup> in an octahedral site.



**Table S1.** Main cell parameters of processing and refinement of the  $\text{Na}_3\text{AlF}_6:0.03\text{Mn}^{4+}, x\text{Fe}^{3+}$  samples.

| x ( $\text{Fe}^{3+}$ ) | Space group        | Cell Parameters |        |         |                     | $R_p, R_{wp}$ (%), $\chi^2$ |
|------------------------|--------------------|-----------------|--------|---------|---------------------|-----------------------------|
|                        |                    | a (Å)           | b (Å)  | c (Å)   | V (Å <sup>3</sup> ) |                             |
| 0                      | P2 <sub>1</sub> /c | 5.4085          | 5.5988 | 9.46200 | 235.609             | 7.86, 10, 3.89              |
| 0.01                   | P2 <sub>1</sub> /c | 5.4099          | 5.5991 | 9.4617  | 235.663             | 7.05, 9.34, 3.09            |
| 0.05                   | P2 <sub>1</sub> /c | 5.4115          | 5.6021 | 9.4655  | 235.964             | 6.30, 8.32, 2.69            |
| 0.10                   | P2 <sub>1</sub> /c | 5.4166          | 5.6084 | 9.4748  | 236.711             | 5.99, 7.95, 2.65            |
| 0.15                   | P2 <sub>1</sub> /c | 5.4181          | 5.6108 | 9.4763  | 236.939             | 5.17, 6.68, 2.11            |
| 0.20                   | P2 <sub>1</sub> /c | 5.4202          | 5.6131 | 9.4801  | 237.241             | 5.16, 6.64, 2.17            |
| 0.25                   | P2 <sub>1</sub> /c | 5.4223          | 5.6159 | 9.4844  | 237.544             | 4.94, 6.35, 2.24            |

**Table S2.** Fractional atomic coordinates and Wyckoff sites of the  $\text{Na}_3\text{AlF}_6:0.03\text{Mn}^{4+}, 0.15\text{Fe}^{3+}$  sample.

| <b>Atoms</b> | <b>x</b> | <b>y</b> | <b>z</b> | <b>Wyckoff sites</b> | <b>Occ.</b> |
|--------------|----------|----------|----------|----------------------|-------------|
| Na1          | 0.27186  | 0.05423  | 0.75375  | 4e                   | 1           |
| Na2          | 0.5      | 0        | 0.5      | 2d                   | 1           |
| Al1          | 0        | 0        | 0        | 2a                   | 0.82        |
| Mn1          | 0        | 0        | 0        | 2a                   | 0.03        |
| Fe1          | 0        | 0        | 0        | 2a                   | 0.15        |
| F1           | 0.11350  | 0.04448  | 0.21906  | 4e                   | 1           |
| F2           | 0.22960  | 0.73172  | 0.06265  | 4e                   | 1           |
| F3           | 0.32695  | 0.17715  | 0.04772  | 4e                   | 1           |

**Table S3.** The excitation peak wavelength ( $\lambda_{\text{ex}}$ ), emission peak wavelength ( $\lambda_{\text{em}}$ ) and FWHM values of Fe<sup>3+</sup>-doped phosphors.

| Phosphors                                                           | $\lambda_{\text{ex}}$ (nm) | $\lambda_{\text{em}}$ (nm) | FWHM (nm) | Ref.      |
|---------------------------------------------------------------------|----------------------------|----------------------------|-----------|-----------|
| KAl <sub>11</sub> O <sub>17</sub> :Fe <sup>3+</sup>                 | 340                        | 770                        | -         | 1         |
| Ca <sub>2</sub> InSbO <sub>6</sub> :Fe <sup>3+</sup>                | 340                        | 935                        | 126       | 2         |
| Ca <sub>2</sub> LuSbO <sub>6</sub> :Fe <sup>3+</sup>                | 336                        | 927                        | 128       | 3         |
| Ca <sub>2</sub> YSbO <sub>6</sub> :Fe <sup>3+</sup>                 | 345                        | 938                        | 135       |           |
| SrAl <sub>12</sub> O <sub>19</sub> : Fe <sup>3+</sup>               | 270                        | 812                        | -         | 4         |
| CaAl <sub>12</sub> O <sub>19</sub> :Fe <sup>3+</sup>                | 260                        | 810                        | -         | 5         |
| LiAl <sub>5</sub> O <sub>8</sub> :Fe <sup>3+</sup>                  | 284                        | 673                        | -         | 6         |
| NaAl <sub>5</sub> O <sub>8</sub> :Fe <sup>3+</sup>                  | 346                        | 754                        | -         | 7         |
| NaScSi <sub>2</sub> O <sub>6</sub> :Fe <sup>3+</sup>                | 300                        | 900                        | 135       | 8         |
| Sr <sub>9</sub> Ga(PO <sub>4</sub> ) <sub>7</sub> :Fe <sup>3+</sup> | 330                        | 915                        | 155       | 9         |
| ZnGa <sub>2</sub> O <sub>4</sub> :Fe <sup>3+</sup>                  | 344                        | 720                        | 70        | 10        |
| BaSnO <sub>3</sub> :Fe <sup>3+</sup>                                | 380                        | 896                        | 105       | 11        |
| NAF:Mn <sup>4+</sup> , Fe <sup>3+</sup>                             | 463                        | 826                        | 127       | This work |

## References

1. G. Liu, S. Zhang and Z. Xia, *Opt. Lett.*, 2023, **48**, 1296-1299.
2. D. Liu, G. Li, P. Dang, Q. Zhang, Y. Wei, L. Qiu, M. S. Molokeev, H. Lian, M. Shang and J. Lin, *Light Sci. Appl.*, 2022, **11**, 1296.
3. X. He, Y. Chen, C. Xia, K. Muhammad, Z. D. Syeda, Y. Guo, S. Xie, X. Liu and L. Li, *J. Amer. Ceram. Soc.*, 2024, **107**, 1-13.
4. S. Zhang, J. Zeng, H. Ye, Z. Li, Y. Lv, L. Xiong, Y. Hu and Y. Li, *Adv. Photon. Res.*, 2023, **4**, 2300011.
5. P. Rodionovs, M. Kemere, A. Antuzevics, A. Sarakovskis, A. Fedotovs and U. Rogulis, *Opt. Mater.*, 2023, **144**, 114342.
6. Y. Yin, X. Zhang, L. Guangxi and W. Haibo, *Chin. J. Lumin.*, 2010, **31**, 473-476.
7. K. Cheng, W. Huang, X. Liu, X. Gong and C. Deng, *J. Alloys Comp.*, 2023, **964**, 171240.
8. X. Zhang, D. Chen, X. Chen, C. Zhou, P. Chen, Q. Pang and L. Zhou, *Dalton Trans.*, 2022, **51**, 14243-14249.
9. F. Zhao, Y. Shao, Z. Song and Q. Liu, *Inorg. Chem. Front.*, 2023, **10**, 6701-6710.
10. L. Xiang, X. Zhou, Y. Wang, L. Li, S. Jiang, G. Xiang, C. Jing, J. Li and L. Yao, *J. Lumin.*, 2022, **252**, 119293.
11. M. Li, Y. Jin, H. Wu and Y. Hu, *Mater. Res. Appl.*, 2023, **17**, 286-294.
